# Supplementary material
Source: HighWire-hosted journal article supplement (https://cmaj.ca/highwire/filestream/151090/field_highwire_adjunct_files/1/231547-res-2-at.pdf)
Supplement: 231547-res-2-at.pdf [file 231547-res-2-at.pdf]

**Online Appendix 2, Table S1. Hypertensive disorders of pregnancy (HDP) categories and related International Statistical Classification of Diseases and Related Health Problems, 10th revision, Canadian version (ICD-10-CA) codes and definitions**

| HDP category                        | ICD-10-CA codes and definitions                                                                                                                                                                                                                                                                                                                   |
|-------------------------------------|---------------------------------------------------------------------------------------------------------------------------------------------------------------------------------------------------------------------------------------------------------------------------------------------------------------------------------------------------|
| Pre-existing (chronic) hypertension | O10 – Pre-existing hypertension complicating pregnancy, childbirth and the puerperium<br>O11 – Pre-eclampsia superimposed on chronic hypertension<br>I10 – Essential (primary) hypertension<br>I11 – Hypertensive heart disease<br>I12 – Hypertensive renal disease<br>I13 – Hypertensive heart and renal disease<br>I15 – Secondary hypertension |
| Gestational hypertension            | O13 – Gestational (pregnancy-induced) hypertension                                                                                                                                                                                                                                                                                                |
| Pre-eclampsia                       | O11 – Pre-eclampsia superimposed on chronic hypertension<br>O14 – Pre-eclampsia<br>O15 - Eclampsia                                                                                                                                                                                                                                                |
| Any HDP                             | Any of the above and<br>O16 – Unspecified maternal hypertension                                                                                                                                                                                                                                                                                   |
